# Supplementary material for: Association between AHR Expression and Immune Dysregulation in Pancreatic Ductal Adenocarcinoma: Insights from Comprehensive Immune Profiling of Peripheral Blood Mononuclear Cells
Source: MDPI journal article supplement (doi:10.3390/cancers15184639), 2023-09-19
Supplement: s1 [file s1]

## Supplementary Materials

**Table S1.** Clinical–pathological parameters of the subjects studied.

|                                  | <b>Pancreatic Cancer</b> | <b>Healthy Controls</b> |
|----------------------------------|--------------------------|-------------------------|
| <b>Number</b>                    | 30                       | 30                      |
| <b>Gender (Male:Female)</b>      | 19:11                    | 7:23                    |
| <b>Mean age (range in years)</b> | 61.7 (37–87)             | 50.8 (23–78)            |
| <b>Tumour size pT</b>            |                          |                         |
| 1                                | 0                        |                         |
| 2                                | 8                        |                         |
| 3                                | 10                       |                         |
| 4                                | 12                       |                         |
| <b>pN-category</b>               |                          |                         |
| pN0                              | 6                        |                         |
| pN1                              | 6                        |                         |
| pN2                              | 10                       |                         |
| pN+                              | 8                        |                         |
| <b>Distant metastasis</b>        |                          |                         |
| No                               | 23                       |                         |
| Yes                              | 7                        |                         |
| <b>UICC stage</b>                |                          |                         |
| I                                | 1                        |                         |
| II                               | 11                       |                         |
| III                              | 11                       |                         |
| IV                               | 7                        |                         |
| <b>Radical surgery</b>           |                          |                         |
| No                               | 15                       |                         |
| Yes                              | 15                       |                         |
